# Supplementary material for: Exploring self-compassion in adults with disabilities: the roles of gender, disability history, and leisure-time physical activity
Source: PeerJ journal article supplement (doi:10.7717/peerj.19554), 2025-06-11
Supplement: Codebook.pdf [file Codebook.pdf]

### Codebook of the categorized variables

| Variable | Categories' Description   | Code |
|----------|---------------------------|------|
| Gender   | Male                      | 1    |
|          | Female                    | 2    |
| History  | Hereditary                | 1    |
|          | Congenital                | 2    |
| Time     | No engagement at all      | 0    |
|          | One time a week           | 1    |
|          | Two times a week          | 2    |
|          | Three times a week        | 3    |
|          | Four times a week         | 4    |
|          | Five times or more a week | 5    |
