# Supplementary material for: Exploring self-compassion in adults with disabilities: the roles of gender, disability history, and leisure-time physical activity
Source: PeerJ. 2025 Jun 11;13:e19554. doi: 10.7717/peerj.19554 (PMC12166845; doi:10.7717/peerj.19554)
Supplement: Supplemental Information 1 — Age: A continuous variable representing the participants’ age. LTPA_total: A continual variable represents the total minutes of engagement in leisure-time physical or sport activities. Time: Represents the duration (in minutes) spent on LTPA per session. SC1 to SC26: Items from a self-compassion scale covering aspects such as self-kindness and self-judgment. Disability: A categorical variable indicating whether the participant has a motor or sensory disability. History: Refers to the participant’s disability onset (hereditary vs. congenital). Overall self-compassion: A continuous variable for the total self-compassion score calculated from SC1-SC26: S_Kind, S_Judj, S_Human, Isolation, Mindfulness, Over_Idnt: subscales of self-compassion, representing self-kindness, self-judgment, common humanity, isolation, mindfulness, and over-identification, respectively. [file peerj-13-19554-s001.xlsx]

## Sheet: Data_SC_a_LTPA
Gender	Age	Time	Duration	SC1	SC2	SC3	SC4	SC5	SC6	SC7	SC8	SC9	SC10	SC11	SC12	SC13	SC14	SC15	SC16	SC17	SC18	SC19	SC20	SC21	SC22	SC23	SC24	SC25	SC26	Disability	History	Total_Minutes	Total_Compassion	S_Kind	S_Judj	S_Human	Isolation	Mindfullness	Over_Idnt
1	29	0	0	3	3	4	2	3	3	3	3	3	1	5	3	3	1	1	5	3	5	1	3	2	1	5	5	3	3	1	2	0	2.96154	3	3.6	2.25	3.25	2	3.5
1	27	2	90	5	2	4	3	3	3	3	5	3	5	3	1	3	3	3	5	5	3	3	5	5	5	5	5	3	3	1	1	180	3.69231	3	4.6	3.75	3	4	3.75
1	43	2	90	3	5	4	5	3	5	3	5	3	3	3	3	5	3	3	5	3	5	3	5	5	3	3	5	5	3	1	2	180	3.88462	3	4.2	3.25	5	3	5
1	42	2	90	3	3	4	3	4	3	3	5	3	4	3	3	2	3	3	3	1	3	3	3	5	3	3	3	3	3	1	1	180	3.15385	3.2	3.8	3.5	2.75	2.5	3
1	33	1	45	3	3	3	3	3	3	3	3	3	3	3	3	3	3	3	3	3	3	3	3	3	3	3	3	3	3	1	1	45	3	3	3	3	3	3	3
1	44	3	90	3	5	4	3	3	3	1	5	3	3	5	1	5	4	4	5	4	5	1	5	5	5	4	5	5	4	1	2	270	3.84615	2.6	4.6	3	4.5	4	4.5
1	33	2	90	5	5	3	5	1	5	3	5	3	3	3	1	5	3	3	5	3	5	1	5	5	3	3	5	5	3	1	2	180	3.69231	1.8	4.6	3	5	3	5
1	51	2	60	5	5	3	5	1	5	3	5	3	1	5	1	5	1	1	5	3	5	1	5	5	3	3	5	5	1	1	2	120	3.46154	1.4	5	2	5	2.5	5
1	35	2	60	3	3	4	3	5	3	3	5	4	4	3	4	5	5	5	3	4	3	4	3	5	3	4	3	1	3	1	2	120	3.65385	4	3.8	4	3	4	3
1	22	3	90	5	3	4	5	3	5	3	5	3	3	5	3	5	3	1	5	3	5	3	5	5	3	1	5	5	1	1	2	270	3.73077	2.2	5	2.75	5	3	4.5
1	32	1	30	5	5	1	5	1	5	3	1	3	5	1	3	5	4	5	2	4	5	3	5	1	4	5	5	5	3	1	1	30	3.61538	3	2	3.5	5	3.75	5
1	56	0	0	5	5	3	3	3	3	3	3	3	3	3	3	3	3	3	3	3	3	3	3	3	3	3	3	3	3	1	2	0	3.15385	3	3.4	3	3	3	3.5
1	48	2	90	5	3	4	3	3	5	3	3	4	3	5	3	3	3	3	5	3	3	3	3	5	4	3	5	5	3	1	2	180	3.65385	3	4.6	3.25	3.5	3.5	4
1	41	3	60	3	5	4	5	4	5	3	3	4	1	3	1	3	3	3	3	3	5	3	3	5	3	3	5	3	3	1	2	180	3.42308	2.8	3.4	2.75	4	3.25	4.5
1	46	3	90	3	3	4	1	1	5	3	3	5	3	3	3	3	5	1	3	3	5	4	2	5	5	4	5	5	4	1	2	270	3.5	3.2	3.4	2.75	3.5	4.5	3.75
1	44	2	90	5	5	5	5	1	5	4	5	5	4	5	4	5	5	4	5	5	5	4	5	5	5	5	5	5	5	1	2	180	4.65385	3.8	5	4.25	5	5	5
1	42	2	90	5	5	4	5	3	3	4	5	1	3	3	3	5	3	4	5	3	3	3	5	5	1	3	5	5	3	1	1	180	3.73077	3	4.6	3.75	4.5	2	4.5
1	40	1	30	5	5	4	5	3	5	3	5	3	3	3	3	5	3	1	5	3	5	3	5	5	1	1	2	3	5	1	1	30	3.61538	3	4.6	2.75	4.5	2.5	4.25
1	49	2	45	5	5	3	5	3	5	3	5	3	3	5	3	5	3	3	5	3	5	3	3	5	4	3	5	5	3	2	1	90	3.96154	3	5	3	5	3.25	4.5
1	37	3	60	3	3	4	3	3	3	3	3	3	3	3	3	3	3	3	3	3	3	3	5	3	3	3	5	3	3	1	2	180	3.19231	3	3	3.25	3	3	4
1	42	0	30	5	5	5	5	4	5	5	5	5	5	5	1	5	4	5	5	5	5	3	5	5	4	4	5	5	4	1	2	0	4.57692	3.2	5	5	5	4.5	5
1	39	2	90	3	5	3	5	3	3	3	3	5	3	3	3	5	3	3	3	3	5	3	1	1	5	5	5	3	3	1	2	180	3.46154	3.4	2.6	3	4.5	4	3.5
1	20	0	30	3	5	3	2	4	2	3	3	1	3	5	4	3	3	1	3	1	3	1	3	3	3	3	5	3	3	1	1	0	2.92308	3	3.4	2.5	2.75	2	3.75
1	31	3	90	3	5	4	4	1	5	1	3	1	3	5	3	5	3	1	5	3	5	1	5	5	3	3	5	5	3	1	2	270	3.46154	2.2	4.2	2.25	4.75	2.5	5
1	29	2	90	5	3	3	3	3	3	3	5	4	3	5	3	5	3	3	5	3	5	1	5	5	3	3	5	5	3	1	1	180	3.73077	2.6	5	3	4.5	3.25	4
1	17	3	90	5	5	5	5	1	5	5	3	5	5	1	1	5	5	5	5	5	5	3	3	5	4	5	5	1	5	1	1	270	4.11538	3	3.8	5	4	4.75	4.5
1	28	3	90	4	4	3	5	2	3	2	5	2	1	4	1	4	3	1	3	3	3	1	3	5	2	1	5	4	2	1	1	270	2.92308	1.4	4.2	1.75	4	2.5	3.75
1	33	5	90	4	1	5	3	4	4	4	5	3	5	5	3	5	5	5	3	3	5	4	2	5	5	4	5	2	3	1	2	450	3.92308	3.6	4.4	4.75	3.75	4	3
1	49	2	60	3	3	3	5	3	4	3	3	2	3	3	3	3	3	3	3	3	3	3	3	4	3	3	4	3	3	1	2	120	3.15385	3	3.2	3	3.5	2.75	3.5
1	25	5	90	5	5	5	5	3	5	5	5	4	4	3	1	5	5	5	5	5	5	2	5	5	5	5	5	3	4	1	2	450	4.38462	3	4.6	4.75	4.5	4.75	5
1	20	0	30	4	5	4	5	3	4	3	5	4	3	4	3	4	3	3	4	4	4	3	4	5	3	3	4	3	3	1	1	0	3.73077	3	4.4	3.25	4	3.5	4.25
1	43	3	60	4	4	2	4	5	5	3	3	4	4	4	4	5	4	4	5	4	5	3	5	5	5	5	5	5	5	1	2	180	4.26923	4.4	4.2	3.25	4.75	4.25	4.75
1	36	2	90	3	3	4	3	3	3	3	4	4	4	4	2	4	4	4	4	4	4	2	4	3	4	4	4	3	4	1	1	180	3.53846	3	3.6	3.75	3.5	4	3.5
1	18	2	30	4	3	4	4	2	2	2	4	4	3	4	1	3	5	1	2	4	3	4	5	3	5	4	4	4	3	2	2	60	3.34615	2.8	3.4	2.5	3.5	4.5	3.5
1	21	3	30	5	5	3	5	1	5	1	5	3	1	5	1	5	1	1	5	1	5	1	5	5	1	1	5	5	1	1	1	90	3.15385	1	5	1.5	5	1.5	5
1	48	0	0	3	5	3	3	3	5	3	5	4	1	3	2	4	4	4	4	3	1	3	3	3	4	3	4	4	2	1	2	0	3.30769	2.6	3.6	2.75	3	3.75	4.25
1	28	2	45	3	4	4	3	2	4	4	4	3	2	4	3	4	3	3	4	3	3	3	3	4	4	3	4	5	3	1	2	90	3.42308	2.8	3.8	3.25	3.75	3.25	3.75
1	37	2	90	3	3	4	3	3	3	4	3	5	1	2	4	4	4	4	3	3	3	3	4	3	3	4	3	3	3	1	1	180	3.26923	3.4	2.8	3.25	3.25	3.75	3.25
1	47	0	0	5	3	3	5	4	3	3	3	3	4	3	3	2	5	5	2	4	2	4	4	4	5	5	5	3	4	1	2	0	3.69231	4	3.4	3.75	3	4.25	3.75
1	50	3	30	5	5	5	5	5	5	5	5	5	5	5	5	5	5	4	5	3	5	4	5	5	4	4	5	5	4	1	2	90	4.73077	4.4	5	4.75	5	4.25	5
1	43	0	0	4	4	4	3	3	5	4	5	3	4	5	3	4	4	4	5	4	5	3	3	5	4	4	5	5	3	1	2	0	4.03846	3.2	4.8	4	4.25	3.75	4.25
1	44	1	45	3	3	4	3	4	3	4	4	3	3	4	3	4	3	3	4	2	3	3	4	3	3	2	4	4	3	1	2	45	3.30769	3	3.6	3.5	3.5	2.75	3.5
1	29	0	0	3	3	4	3	5	2	3	2	3	3	4	5	2	3	3	3	3	1	4	2	3	4	3	3	2	3	1	1	0	3.03846	4	3	3.25	2	3.25	2.5
1	37	1	60	5	2	5	1	3	2	5	2	5	5	2	5	3	5	5	3	4	3	4	1	2	4	3	5	1	4	1	1	60	3.42308	3.8	2.8	5	2	4.5	2.5
1	40	1	45	3	3	5	5	2	4	5	5	2	4	1	3	1	3	4	4	3	4	3	4	4	4	4	3	4	4	1	2	45	3.5	3.2	3.4	4.5	3.5	3	3.5
1	44	0	0	2	3	4	5	4	5	4	2	1	4	2	4	5	3	4	5	3	3	3	2	5	3	4	3	2	4	1	2	0	3.42308	3.8	3.2	4	3.75	2.5	3.25
1	43	4	45	3	3	4	3	4	3	4	4	4	3	3	4	3	4	4	3	3	2	5	4	5	5	5	5	3	5	1	2	180	3.76923	4.6	3.6	3.75	2.75	4	3.75
1	42	0	0	3	3	4	3	3	5	4	2	2	4	3	4	2	3	4	3	3	3	3	2	3	3	4	5	2	4	1	2	0	3.23077	3.6	2.8	4	2.5	2.75	3.75
1	21	0	0	4	4	4	4	4	3	3	4	3	3	4	4	4	3	3	3	3	3	3	3	3	3	4	4	3	3	1	1	0	3.42308	3.6	3.6	3.25	3.5	3	3.5
1	32	5	90	5	1	5	5	3	5	5	5	3	4	5	1	5	5	4	5	5	5	5	3	5	5	4	5	5	3	1	2	450	4.26923	3.2	5	4.5	5	4.5	3.5
1	26	2	90	5	5	5	5	2	5	5	5	4	5	1	3	5	5	5	5	5	5	4	2	4	5	5	5	1	2	2	2	180	4.15385	3.2	4	5	4	4.75	4.25
1	20	1	30	5	4	4	5	3	5	4	5	4	4	5	4	5	4	4	5	4	5	4	5	5	4	4	5	4	3	1	1	30	4.34615	3.6	5	4	4.75	4	4.75
1	18	2	30	4	3	4	3	3	2	4	4	4	5	3	2	2	4	5	5	5	3	2	5	1	3	5	5	1	3	2	2	60	3.46154	3	3.4	4.5	2.25	4	3.75
1	32	5	90	2	2	5	5	5	4	4	4	5	4	5	4	5	4	4	3	4	5	5	5	5	5	5	5	1	4	1	2	450	4.19231	4.6	3.8	4.25	4	4.5	4
1	22	3	45	4	4	3	4	2	4	2	4	2	2	4	2	4	3	3	4	2	4	2	4	4	2	2	4	3	3	2	1	135	3.11538	2.2	4	2.5	3.75	2.25	4
1	31	1	60	3	4	3	4	3	4	4	3	3	3	4	3	4	4	4	4	3	4	2	4	4	4	3	2	3	2	1	1	60	3.38462	2.6	3.6	3.5	3.75	3.5	3.5
1	47	0	0	5	3	4	5	3	5	3	4	3	3	4	3	3	4	4	4	3	4	4	4	4	4	4	3	5	4	2	1	0	3.80769	3.6	4.2	3.5	4.25	3.5	3.75
1	27	0	0	3	3	3	3	3	3	4	4	3	5	3	5	3	4	3	3	4	3	4	4	4	4	4	3	3	4	2	2	0	3.53846	4	3.4	3.75	3	3.75	3.25
1	36	2	60	5	2	4	5	3	4	4	4	4	4	5	3	4	2	4	4	4	5	4	4	5	1	4	5	5	4	2	1	120	3.92308	3.6	4.6	4	4.75	2.75	3.75
1	19	4	60	4	4	3	5	3	5	3	5	5	2	3	3	4	3	3	4	3	4	3	4	5	3	3	5	4	2	2	2	240	3.65385	2.8	4.2	2.75	4.25	3.5	4.5
1	44	1	45	3	1	5	3	1	3	5	1	5	5	3	3	5	5	5	3	3	5	3	3	3	3	5	5	5	3	2	2	45	3.61538	3	2.6	5	4.5	4	3
1	#NULL!	2	30	3	3	1	5	2	4	1	4	2	2	4	2	4	2	2	4	2	4	1	4	4	2	1	4	4	2	2	1	60	2.80769	1.6	3.8	1.5	4.25	2	3.75
2	18	5	90	1	5	3	5	3	3	1	2	3	1	1	1	5	4	3	5	1	5	3	3	5	1	3	5	2	4	1	1	450	3	2.8	2.8	2	4.25	2.25	4
2	19	2	45	5	3	4	2	4	5	4	5	4	4	5	3	3	4	4	3	4	3	3	5	5	3	3	5	3	3	1	2	90	3.80769	3.2	4.6	4	2.75	3.75	4.5
2	21	5	45	3	3	5	5	4	5	5	5	4	3	3	3	5	3	5	5	4	5	3	5	5	3	4	5	3	3	2	1	225	4.07692	3.4	4.2	4.5	4.5	3.5	4.5
2	23	3	60	3	2	3	5	3	3	1	3	1	1	1	5	1	1	1	5	3	2	5	1	1	1	4	2	3	3	2	1	180	2.46154	4	2.6	1.5	2.75	1.5	2
2	22	5	45	3	3	4	3	3	3	3	3	1	3	5	4	3	3	3	3	3	3	4	5	5	3	4	3	1	3	2	2	225	3.23077	3.6	3.8	3.25	2.5	2.5	3.5
2	22	5	90	5	3	3	5	5	3	4	5	3	5	5	5	3	3	3	5	5	5	5	5	5	5	3	5	3	5	1	2	450	4.26923	4.6	5	3.75	4	4	4
2	19	1	30	5	5	4	5	4	3	4	5	4	4	5	3	5	4	4	5	4	5	4	5	5	4	4	3	2	4	1	1	30	4.19231	3.8	5	4	4.25	4	4
2	26	5	45	5	3	3	3	5	5	3	5	4	4	5	5	5	3	3	5	4	5	4	5	5	5	5	5	2	5	1	2	225	4.26923	4.8	5	3.25	3.75	4	4.5
2	20	0	0	1	1	2	2	2	1	3	3	1	3	1	4	1	1	1	2	2	2	2	1	1	2	2	1	5	1	2	1	0	1.84615	2.2	1.6	2.25	2.5	1.5	1
2	29	1	30	3	4	4	3	4	4	4	3	3	4	4	3	5	3	3	4	3	5	3	3	4	4	4	4	3	4	1	2	30	3.65385	3.6	3.6	3.75	4	3.25	3.75
2	32	1	90	5	5	4	5	4	5	4	3	3	4	3	1	5	3	4	5	4	5	3	3	3	4	4	3	3	4	1	1	90	3.80769	3.2	3.8	4	4.5	3.5	4
2	42	0	30	5	3	5	1	5	3	5	4	5	5	3	5	1	5	5	2	5	3	4	1	5	5	5	5	2	5	1	2	0	3.92308	4.8	3.8	5	1.75	5	3
2	22	1	45	3	1	4	1	3	4	1	4	1	3	3	2	4	3	4	2	2	4	3	4	3	1	5	2	3	3	1	1	45	2.80769	3.2	3	3	3	1.75	2.75
2	39	5	45	2	3	3	3	3	3	3	4	3	5	3	3	4	4	3	3	3	5	1	2	3	5	3	5	1	2	1	2	225	3.15385	2.4	3	3.5	3.25	3.75	3.25
2	24	2	30	4	4	3	3	2	4	3	3	3	3	3	3	3	3	3	3	3	3	3	3	3	3	3	3	4	2	1	1	60	3.07692	2.6	3.2	3	3.25	3	3.5
2	#NULL!	2	30	3	4	4	3	4	3	3	4	2	3	2	3	2	3	3	2	3	3	2	4	4	3	3	4	4	2	1	1	60	3.07692	2.8	3	3.25	3	2.75	3.75
2	#NULL!	5	30	4	5	4	4	5	3	3	3	3	3	3	3	3	3	3	4	1	3	2	3	2	3	3	4	3	3	1	1	150	3.19231	3.2	3.2	3.25	3.25	2.5	3.75
2	33	0	30	1	1	2	1	2	1	2	1	2	2	1	5	1	2	2	1	2	1	5	1	3	2	4	1	1	5	2	1	0	2	4.2	1.4	2	1	2	1
2	32	4	60	3	1	4	3	3	3	5	3	4	4	3	4	3	3	4	2	3	2	4	4	4	5	5	2	2	4	2	2	240	3.34615	4	3	4.25	2.5	3.75	2.5
2	17	0	0	4	4	4	3	3	3	3	3	3	3	3	3	3	3	3	3	1	4	1	4	4	2	2	4	3	3	1	1	0	3.03846	2.4	3.4	3.25	3.25	2.25	3.75
2	18	3	45	5	4	5	5	5	5	4	5	3	5	5	5	4	3	5	5	5	5	5	5	5	5	5	5	3	5	2	1	135	4.65385	5	5	4.75	4.25	4	4.75
2	21	0	0	2	5	5	5	1	5	4	5	3	4	5	2	4	2	1	5	3	5	1	5	5	5	4	5	5	4	2	1	0	3.84615	2.4	4.4	3.5	4.75	3.25	5
2	28	5	30	4	3	4	3	4	3	5	5	3	5	5	5	5	4	5	5	2	5	5	5	5	5	5	5	1	5	2	2	150	4.26923	4.8	4.8	4.75	3.5	3.5	4
2	16	0	0	2	3	5	1	3	3	5	1	4	3	2	1	3	4	4	1	4	3	1	1	2	3	1	2	5	3	2	1	0	2.69231	1.8	1.6	4.25	3	3.75	2.25
2	20	3	45	3	2	4	1	3	1	5	3	3	3	2	3	2	4	3	2	3	3	3	3	1	3	1	3	2	3	2	1	135	2.65385	2.6	2.2	3.75	2	3.25	2.25
2	20	3	45	3	2	4	1	3	1	5	3	3	3	2	3	2	4	3	2	3	3	3	3	1	3	1	3	2	3	2	1	135	2.65385	2.6	2.2	3.75	2	3.25	2.25
2	23	0	0	3	3	4	3	4	2	4	2	3	3	3	4	4	3	4	3	4	3	4	3	4	4	3	3	4	4	1	1	0	3.38462	3.8	3	3.75	3.5	3.5	2.75
2	20	0	0	3	1	3	2	1	2	3	2	2	3	2	1	1	3	3	2	2	2	3	2	1	2	2	1	4	2	2	1	0	2.11538	1.8	2	3	2.25	2.25	1.5
2	19	1	45	4	4	4	4	5	4	4	3	4	3	4	3	3	4	4	4	4	3	3	4	4	3	4	3	3	4	1	2	45	3.69231	3.8	3.8	3.75	3.25	3.75	3.75
2	42	3	45	3	4	5	5	5	3	5	3	5	5	2	3	5	3	5	5	4	3	4	4	4	5	5	5	3	4	2	1	135	4.11538	4.2	3.4	5	4	4.25	4
2	54	0	0	5	5	4	5	5	5	1	5	1	1	5	4	2	5	1	5	2	2	5	5	4	3	5	5	3	3	2	1	0	3.69231	4.4	4.8	1.75	3	2.75	5
2	26	3	60	3	3	4	2	4	3	3	3	2	3	3	4	2	4	4	3	3	2	4	3	3	4	4	2	2	3	2	1	180	3.07692	3.8	3	3.5	2	3.25	2.75
2	34	3	45	3	2	1	3	3	2	3	4	4	1	5	1	2	1	2	3	3	2	1	5	4	1	2	5	5	1	2	1	135	2.65385	1.6	3.8	1.75	3	2.25	3.5
2	20	2	45	5	4	4	2	2	5	4	5	4	4	4	3	4	4	4	5	4	4	4	3	4	4	4	5	5	3	2	1	90	3.96154	3.2	4.6	4	3.75	4	4.25
2	17	1	90	5	2	4	4	3	4	4	3	3	4	5	4	5	5	5	3	4	5	3	5	5	5	5	5	3	4	2	1	90	4.11538	3.8	4.2	4.25	4.25	4.25	4
2	41	0	0	5	5	3	4	3	5	3	3	3	4	4	4	4	3	4	3	5	3	5	5	5	5	5	5	5	5	2	1	0	4.15385	4.4	4	3.5	4	4	5
2	40	1	45	3	3	3	3	4	3	4	3	3	4	3	3	3	3	4	2	4	3	3	3	3	4	3	4	4	3	1	2	45	3.26923	3.2	2.8	3.75	3.25	3.5	3.25
2	40	3	90	5	5	4	5	1	5	4	3	3	4	4	2	5	4	4	4	4	5	5	4	4	4	4	5	4	4	1	2	270	4.03846	3.2	4	4	4.75	3.75	4.75
2	45	4	60	5	5	3	3	4	5	1	3	2	4	5	4	5	1	1	5	2	4	1	4	4	2	2	5	4	2	2	1	240	3.30769	2.6	4.4	2.25	4	1.75	4.75
2	29	0	0	3	3	3	3	4	3	3	3	3	3	5	3	3	3	3	3	3	3	3	3	4	3	3	3	4	2	1	1	0	3.15385	3	3.6	3	3.25	3	3
1	29	0	0	3	3	4	2	3	3	3	3	3	1	5	3	3	1	1	5	3	5	1	3	2	1	5	5	3	3	1	2	0	2.96154	3	3.6	2.25	3.25	2	3.5
1	27	2	90	5	2	4	3	3	3	3	5	3	5	3	1	3	3	3	5	5	3	3	5	5	5	5	5	3	3	1	1	180	3.69231	3	4.6	3.75	3	4	3.75
1	43	2	90	3	5	4	5	3	5	3	5	3	3	3	3	5	3	3	5	3	5	3	5	5	3	3	5	5	3	1	2	180	3.88462	3	4.2	3.25	5	3	5
1	43	3	60	4	4	2	4	5	5	3	3	4	4	4	4	5	4	4	5	4	5	3	5	5	5	5	5	5	5	1	2	180	4.26923	4.4	4.2	3.25	4.75	4.25	4.75
1	19	3	90	3	5	5	3	4	4	3	5	3	3	4	5	5	5	4	5	5	5	3	4	5	5	5	5	3	3	2	1	270	4.19231	4	4.4	3.75	4	4.5	4.5
1	36	2	90	3	3	4	3	3	3	3	4	4	4	4	2	4	4	4	4	4	4	2	4	3	4	4	4	3	4	1	1	180	3.53846	3	3.6	3.75	3.5	4	3.5
1	18	2	30	4	3	4	4	2	2	2	4	4	3	4	1	3	5	1	2	4	3	4	5	3	5	4	4	4	3	2	2	60	3.34615	2.8	3.4	2.5	3.5	4.5	3.5
1	21	3	30	5	5	3	5	1	5	1	5	3	1	5	1	5	1	1	5	1	5	1	5	5	1	1	5	5	1	1	1	90	3.15385	1	5	1.5	5	1.5	5
1	48	0	0	3	5	3	3	3	5	3	5	4	1	3	2	4	4	4	4	3	1	3	3	3	4	3	4	4	2	1	2	0	3.30769	2.6	3.6	2.75	3	3.75	4.25
1	28	2	45	3	4	4	3	2	4	4	4	3	2	4	3	4	3	3	4	3	3	3	3	4	4	3	4	5	3	1	2	90	3.42308	2.8	3.8	3.25	3.75	3.25	3.75
1	37	2	90	3	3	4	3	3	3	4	3	5	1	2	4	4	4	4	3	3	3	3	4	3	3	4	3	3	3	1	1	180	3.26923	3.4	2.8	3.25	3.25	3.75	3.25
1	47	0	0	5	3	3	5	4	3	3	3	3	4	3	3	2	5	5	2	4	2	4	4	4	5	5	5	3	4	1	2	0	3.69231	4	3.4	3.75	3	4.25	3.75
1	32	3	90	5	3	3	5	3	5	5	5	5	5	3	5	3	5	3	4	3	4	3	5	5	5	5	5	5	3	2	2	270	4.23077	3.8	4.4	4	4.25	4.5	4.5
1	50	3	30	5	5	5	5	5	5	5	5	5	5	5	5	5	5	4	5	3	5	4	5	5	4	4	5	5	4	1	2	90	4.73077	4.4	5	4.75	5	4.25	5
1	43	0	0	4	4	4	3	3	5	4	5	3	4	5	3	4	4	4	5	4	5	3	3	5	4	4	5	5	3	1	2	0	4.03846	3.2	4.8	4	4.25	3.75	4.25
1	44	1	45	3	3	4	3	4	3	4	4	3	3	4	3	4	3	3	4	2	3	3	4	3	3	2	4	4	3	1	2	45	3.30769	3	3.6	3.5	3.5	2.75	3.5
1	31	1	60	3	4	3	4	3	4	4	3	3	3	4	3	4	4	4	4	3	4	2	4	4	4	3	2	3	2	1	1	60	3.38462	2.6	3.6	3.5	3.75	3.5	3.5
1	47	0	0	5	3	4	5	3	5	3	4	3	3	4	3	3	4	4	4	3	4	4	4	4	4	4	3	5	4	2	1	0	3.80769	3.6	4.2	3.5	4.25	3.5	3.75
1	27	0	0	3	3	3	3	3	3	4	4	3	5	3	5	3	4	3	3	4	3	4	4	4	4	4	3	3	4	2	2	0	3.53846	4	3.4	3.75	3	3.75	3.25
2	22	1	45	3	1	4	1	3	4	1	4	1	3	3	2	4	3	4	2	2	4	3	4	3	1	5	2	3	3	1	1	45	2.80769	3.2	3	3	3	1.75	2.75
2	39	5	45	2	3	3	3	3	3	3	4	3	5	3	3	4	4	3	3	3	5	1	2	3	5	3	5	1	2	1	2	225	3.15385	2.4	3	3.5	3.25	3.75	3.25
2	24	2	30	4	4	3	3	2	4	3	3	3	3	3	3	3	3	3	3	3	3	3	3	3	3	3	3	4	2	1	1	60	3.07692	2.6	3.2	3	3.25	3	3.5
2	#NULL!	2	30	3	4	4	3	4	3	3	4	2	3	2	3	2	3	3	2	3	3	2	4	4	3	3	4	4	2	1	1	60	3.07692	2.8	3	3.25	3	2.75	3.75
2	#NULL!	5	30	4	5	4	4	5	3	3	3	3	3	3	3	3	3	3	4	1	3	2	3	2	3	3	4	3	3	1	1	150	3.19231	3.2	3.2	3.25	3.25	2.5	3.75
2	33	0	30	1	1	2	1	2	1	2	1	2	2	1	5	1	2	2	1	2	1	5	1	3	2	4	1	1	5	2	1	0	2	4.2	1.4	2	1	2	1
2	32	4	60	3	1	4	3	3	3	5	3	4	4	3	4	3	3	4	2	3	2	4	4	4	5	5	2	2	4	2	2	240	3.34615	4	3	4.25	2.5	3.75	2.5
2	17	0	0	4	4	4	3	3	3	3	3	3	3	3	3	3	3	3	3	1	4	1	4	4	2	2	4	3	3	1	1	0	3.03846	2.4	3.4	3.25	3.25	2.25	3.75
2	18	3	45	5	4	5	5	5	5	4	5	3	5	5	5	4	3	5	5	5	5	5	5	5	5	5	5	3	5	2	1	135	4.65385	5	5	4.75	4.25	4	4.75
2	21	0	0	2	5	5	5	1	5	4	5	3	4	5	2	4	2	1	5	3	5	1	5	5	5	4	5	5	4	2	1	0	3.84615	2.4	4.4	3.5	4.75	3.25	5
2	28	5	30	4	3	4	3	4	3	5	5	3	5	5	5	5	4	5	5	2	5	5	5	5	5	5	5	1	5	2	2	150	4.26923	4.8	4.8	4.75	3.5	3.5	4
2	16	0	0	2	3	5	1	3	3	5	1	4	3	2	1	3	4	4	1	4	3	1	1	2	3	1	2	5	3	2	1	0	2.69231	1.8	1.6	4.25	3	3.75	2.25
2	20	3	45	3	2	4	1	3	1	5	3	3	3	2	3	2	4	3	2	3	3	3	3	1	3	1	3	2	3	2	1	135	2.65385	2.6	2.2	3.75	2	3.25	2.25
2	20	3	45	3	2	4	1	3	1	5	3	3	3	2	3	2	4	3	2	3	3	3	3	1	3	1	3	2	3	2	1	135	2.65385	2.6	2.2	3.75	2	3.25	2.25
2	23	0	0	3	3	4	3	4	2	4	2	3	3	3	4	4	3	4	3	4	3	4	3	4	4	3	3	4	4	1	1	0	3.38462	3.8	3	3.75	3.5	3.5	2.75
2	20	0	0	3	1	3	2	1	2	3	2	2	3	2	1	1	3	3	2	2	2	3	2	1	2	2	1	4	2	2	1	0	2.11538	1.8	2	3	2.25	2.25	1.5
2	19	1	45	4	4	4	4	5	4	4	3	4	3	4	3	3	4	4	4	4	3	3	4	4	3	4	3	3	4	1	2	45	3.69231	3.8	3.8	3.75	3.25	3.75	3.75
2	42	3	45	3	4	5	5	5	3	5	3	5	5	2	3	5	3	5	5	4	3	4	4	4	5	5	5	3	4	2	1	135	4.11538	4.2	3.4	5	4	4.25	4
2	54	0	0	5	5	4	5	5	5	1	5	1	1	5	4	2	5	1	5	2	2	5	5	4	3	5	5	3	3	2	1	0	3.69231	4.4	4.8	1.75	3	2.75	5
2	26	3	60	3	3	4	2	4	3	3	3	2	3	3	4	2	4	4	3	3	2	4	3	3	4	4	2	2	3	2	1	180	3.07692	3.8	3	3.5	2	3.25	2.75
2	34	3	45	3	2	1	3	3	2	3	4	4	1	5	1	2	1	2	3	3	2	1	5	4	1	2	5	5	1	2	1	135	2.65385	1.6	3.8	1.75	3	2.25	3.5
2	20	2	45	5	4	4	2	2	5	4	5	4	4	4	3	4	4	4	5	4	4	4	3	4	4	4	5	5	3	2	1	90	3.96154	3.2	4.6	4	3.75	4	4.25
2	17	1	90	5	2	4	4	3	4	4	3	3	4	5	4	5	5	5	3	4	5	3	5	5	5	5	5	3	4	2	1	90	4.11538	3.8	4.2	4.25	4.25	4.25	4
2	41	0	0	5	5	3	4	3	5	3	3	3	4	4	4	4	3	4	3	5	3	5	5	5	5	5	5	5	5	2	1	0	4.15385	4.4	4	3.5	4	4	5
2	40	1	45	3	3	3	3	4	3	4	3	3	4	3	3	3	3	4	2	4	3	3	3	3	4	3	4	4	3	1	2	45	3.26923	3.2	2.8	3.75	3.25	3.5	3.25
2	40	3	90	5	5	4	5	1	5	4	3	3	4	4	2	5	4	4	4	4	5	5	4	4	4	4	5	4	4	1	2	270	4.03846	3.2	4	4	4.75	3.75	4.75
2	45	4	60	5	5	3	3	4	5	1	3	2	4	5	4	5	1	1	5	2	4	1	4	4	2	2	5	4	2	2	1	240	3.30769	2.6	4.4	2.25	4	1.75	4.75
2	29	0	0	3	3	3	3	4	3	3	3	3	3	5	3	3	3	3	3	3	3	3	3	4	3	3	3	4	2	1	1	0	3.15385	3	3.6	3	3.25	3	3
1	29	0	0	3	3	4	2	3	3	3	3	3	1	5	3	3	1	1	5	3	5	1	3	2	1	5	5	3	3	1	2	0	2.96154	3	3.6	2.25	3.25	2	3.5
1	27	2	90	5	2	4	3	3	3	3	5	3	5	3	1	3	3	3	5	5	3	3	5	5	5	5	5	3	3	1	1	180	3.69231	3	4.6	3.75	3	4	3.75
1	43	2	90	3	5	4	5	3	5	3	5	3	3	3	3	5	3	3	5	3	5	3	5	5	3	3	5	5	3	1	2	180	3.88462	3	4.2	3.25	5	3	5
1	42	2	90	3	3	4	3	4	3	3	5	3	4	3	3	2	3	3	3	1	3	3	3	5	3	3	3	3	3	1	1	180	3.15385	3.2	3.8	3.5	2.75	2.5	3
2	18	5	90	1	5	3	5	3	3	1	2	3	1	1	1	5	4	3	5	1	5	3	3	5	1	3	5	2	4	1	1	450	3	2.8	2.8	2	4.25	2.25	4
2	21	0	0	2	5	5	5	1	5	4	5	3	4	5	2	4	2	1	5	3	5	1	5	5	5	4	5	5	4	2	1	0	3.84615	2.4	4.4	3.5	4.75	3.25	5
2	28	5	30	4	3	4	3	4	3	5	5	3	5	5	5	5	4	5	5	2	5	5	5	5	5	5	5	1	5	2	2	150	4.26923	4.8	4.8	4.75	3.5	3.5	4
2	16	0	0	2	3	5	1	3	3	5	1	4	3	2	1	3	4	4	1	4	3	1	1	2	3	1	2	5	3	2	1	0	2.69231	1.8	1.6	4.25	3	3.75	2.25
2	20	3	45	3	2	4	1	3	1	5	3	3	3	2	3	2	4	3	2	3	3	3	3	1	3	1	3	2	3	2	1	135	2.65385	2.6	2.2	3.75	2	3.25	2.25
2	20	3	45	3	2	4	1	3	1	5	3	3	3	2	3	2	4	3	2	3	3	3	3	1	3	1	3	2	3	2	1	135	2.65385	2.6	2.2	3.75	2	3.25	2.25
2	23	0	0	3	3	4	3	4	2	4	2	3	3	3	4	4	3	4	3	4	3	4	3	4	4	3	3	4	4	1	1	0	3.38462	3.8	3	3.75	3.5	3.5	2.75
2	20	0	0	3	1	3	2	1	2	3	2	2	3	2	1	1	3	3	2	2	2	3	2	1	2	2	1	4	2	2	1	0	2.11538	1.8	2	3	2.25	2.25	1.5
2	19	1	45	4	4	4	4	5	4	4	3	4	3	4	3	3	4	4	4	4	3	3	4	4	3	4	3	3	4	1	2	45	3.69231	3.8	3.8	3.75	3.25	3.75	3.75
